# Supplementary material
Source: PubMed Central journal article supplement (PMC5617665)

| <b>Antibodies</b>               | <b>Clones</b>                              | <b>Supplier</b> | <b>Cat. No</b> |
|---------------------------------|--------------------------------------------|-----------------|----------------|
| c-kit(CD117)                    | 2B8                                        | BD Pharmingen   | 553355         |
| Sca-1(Ly6-A/E)                  | D7                                         | BD Pharmingen   | 558162         |
| c-kit(CD117)                    | 2B8                                        | BioLegend       | 105826         |
| c-kit(CD117)                    | 2B8                                        | BioLegend       | 105808         |
| Sca-1(Ly6-A/E)                  | D7                                         | BioLegend       | 122514         |
| Mouse Lineage Antibody Cocktail | 145-2C11, M1/70, RA3-6B2, TER-119, RB6-8C5 | BD Pharmingen   | 558074/ 561301 |
| Biotin Mouse Lineage Panel      | 145-2C11, M1/70, RA3-6B2, TER-119, RB6-8C5 | BD Pharmingen   | 559971         |
| CD48                            | HM48-1                                     | BioLegend       | 103432         |
| CD150                           | TC15-12F 12.2                              | BioLegend       | 115922         |
| CD34                            | RAM34                                      | eBioscience     | 11-0341        |
| CD16/CD32                       | 93                                         | eBioscience     | 48-0161        |
| CD3e                            | 145-2C11                                   | BioLegend       | 100330         |
| CD19                            | 1D3                                        | eBioscience     | 11-0193        |
| CD19                            | 1D3                                        | BD Pharmingen   | 557399         |
| B220                            | RA3-6B2                                    | eBioscience     | 11-0452        |
| Gr1(Ly-6G/C)                    | RB6-8C5                                    | eBioscience     | 48-5931        |
| CD11b                           | M1/70                                      | BD Pharmingen   | 552850         |
| CD127                           | SB/199                                     | BD Pharmingen   | 564175         |
| CD106/VCAM-1                    | 429                                        | BD Pharmingen   | 553332         |
| CD51                            | RMV-7                                      | eBioscience     | 13-0512        |
| CD31                            | MEC 13.3                                   | BD Pharmingen   | 553373         |
| CD31                            | 390                                        | eBioscience     | 17-0311        |
| CD135                           | A2F10                                      | BioLegend       | 135315         |
| IgM                             | RMM-1                                      | BioLegend       | 406515         |

|                   |           |               |         |
|-------------------|-----------|---------------|---------|
| IgD               | 11-26c.2a | BioLegend     | 405712  |
| CD45.1            | A20       | BioLegend     | 110726  |
| CD45.1            | A20       | BD Pharmingen | 553776  |
| CD45.2            | 104       | BD Pharmingen | 558702  |
| CD144/VE-cadherin | BV13      | BioLegend     | 138005  |
| CD144/VE-cadherin | BV13      | eBioscience   | 53-1441 |
| CD45              | 30-F11    | eBioscience   | 13-0451 |
| TER-119           | TER-119   | eBioscience   | 13-5921 |
| CD61              | 2C9.G3    | eBioscience   | 11-0611 |
| Ki-67             | SolA15    | eBioscience   | 11-5698 |

1

2 **Supplementary Table 1: Antibodies used for flow cytometry analysis.**

### 3 **Supplementary Figures**

4 **Supplementary Figure 1.** Fluorescent microscopy image showing the distribution of Del-1 in the  
5 BM. VE-cadherin staining is used for endothelial cells (scale bar, 100  $\mu$ m).

6

7 **Supplementary Figure 2.** G-CSF levels in the plasma of *Edil3*<sup>-/-</sup> (n=10 mice) and *Edil3*<sup>+/+</sup> mice  
8 (n= 9 mice). Mann-Whitney U test.

9

10 **Supplementary Figure 3. Analysis of lymphoid lineage populations in the BM of *Edil3*<sup>-/-</sup> and**  
11 ***Edil3*<sup>+/+</sup> mice.** (A) Representative flow cytometry plots and number of (B) B220<sup>+</sup>CD19<sup>-</sup>IgM<sup>-</sup> pre-  
12 pro B, (C) B220<sup>+</sup>CD19<sup>+</sup>IgM<sup>hi</sup>IgD<sup>-</sup> transitional (D) B220<sup>+</sup>CD19<sup>+</sup>IgM<sup>int</sup> immature and (E)  
13 B220<sup>+</sup>CD19<sup>+</sup>IgD<sup>+</sup> mature B cells in the BM of 10 week-old *Edil3*<sup>-/-</sup> (n=8 mice) and *Edil3*<sup>+/+</sup> mice  
14 (n=12 mice). (F) Number of common lymphoid progenitors (CLP;  
15 Lin<sup>-</sup>Sca1<sup>low</sup>cKit<sup>low</sup>Flt3<sup>+</sup>IL7R $\alpha$ <sup>+</sup>) in the BM of 10 week-old *Edil3*<sup>-/-</sup> and *Edil3*<sup>+/+</sup> mice (n= 5 mice  
16 per group). Data presented as mean $\pm$ SEM. Mann-Whitney U test.

17

18 **Supplementary Figure 4. Hematopoietic progenitors in Del-1 deficiency.** (A) Representative  
19 flow cytometry plots, (B) LSK, (C) LT-HSC, (D) ST-HSC and (E) MPP in the BM of *Edil3*<sup>-/-</sup> and  
20 *Edil3*<sup>+/+</sup> mice (n=10 mice per group). (F) Representative flow cytometry plots and (G) percentage  
21 of Flt3<sup>-</sup>CD34<sup>+</sup> myeloid biased MPPs in *Edil3*<sup>-/-</sup> (n= 8 mice) and *Edil3*<sup>+/+</sup> mice (n=9 mice). (H)  
22 *Cebpe*, *Csf1r*, *Csf2ra*, *Irf8* expression in CD48<sup>-</sup> LSK cells from the BM of *Edil3*<sup>-/-</sup> and *Edil3*<sup>+/+</sup>  
23 mice (n=4 mice per group). The mRNA expression was normalized against 18s. Data presented  
24 as mean $\pm$ SEM. Mann-Whitney U test, \**P*<0.05, \*\**P*<0.01.

25

26 **Supplementary Figure 5. Circulating and splenic hematopoietic and myeloid progenitor**  
27 **cells under steady-state conditions.** (A) LSK and (B) LK cell numbers in the peripheral blood of  
28 *Edil3*<sup>-/-</sup> and *Edil3*<sup>+/+</sup> mice (n=7-9 mice per group). (C) Number of CFC in the peripheral blood of  
29 *Edil3*<sup>-/-</sup> and *Edil3*<sup>+/+</sup> mice (n=6-7 mice per group). (D) Numbers and (E) percentages of LSK cells  
30 in the spleen of *Edil3*<sup>-/-</sup> and *Edil3*<sup>+/+</sup> mice (n=8 mice per group) and (F) numbers and (G)  
31 percentages of LK cells in the spleen of *Edil3*<sup>-/-</sup> and *Edil3*<sup>+/+</sup> mice (n=8 mice per group). Data  
32 presented as mean±SEM. Mann-Whitney U test, \**P*<0.05, \*\**P*<0.01.

33

34 **Supplementary Figure 6. Differentiation assay of MPPs and CMPs.** (A) MPPs from WT mice  
35 were cultured with Del-1-Fc or Fc-control (500 ng/ml each) in cell suspension cultures and  
36 analysis was performed after 48h. Percentage of GMPs is shown (n=5 cultures). (B) CMPs from  
37 WT mice were cultured with Del-1-Fc or Fc-control (500 ng/ml each) in cell suspension cultures  
38 and analysis was performed after 48h. Percentage of GMPs is shown (n=5 cultures). Mann-  
39 Whitney U test.

40

41 **Supplementary Figure 7. Del-1 does not affect early homing into the BM.** Short-term  
42 migration assay of hematopoietic progenitors. Accumulation of CFSE<sup>+</sup> LSK in the BM of  
43 recipient *Edil3*<sup>-/-</sup> (n=6 mice) or *Edil3*<sup>+/+</sup> mice (n=5 mice) at 3h after adoptive transfer of CFSE-  
44 labelled Lin<sup>-</sup> cells from WT mice. Cell accumulation in the BM is expressed as the percentage of  
45 CFSE<sup>+</sup> LSK in total LSK. Data presented as mean±SEM. Mann-Whitney U test.

46

47 **Supplementary Figure 8. β3 integrin mediates the interaction of hematopoietic progenitors**  
48 **with Del-1.** (A) Lethally irradiated *Edil3*<sup>+/+</sup> or *Edil3*<sup>-/-</sup> mice were transplanted with CD45<sup>+</sup> BM  
49 cells derived from *Itgb3*<sup>-/-</sup> mice. Numbers of (B) LSK cells, (C) CMPs, (D) GMPs and (E)  
50 Gr1<sup>hi</sup>CD11b<sup>+</sup>, (F) Gr1<sup>int</sup>CD11b<sup>+</sup> myeloid cells in the BM of recipient *Edil3*<sup>+/+</sup> or *Edil3*<sup>-/-</sup> mice 6

51 weeks post-transplantation (n= 10 mice per group). Data presented as mean±SEM. Mann-  
52 Whitney U test was used.

53

54 **Supplementary Figure 9** (Complementary to Figure 8). G-CSF levels in the plasma of *Edil3*<sup>-/-</sup>  
55 and *Edil3*<sup>+/+</sup> mice at 24h following the second injection of LPS (n=6 mice per group). Mann-  
56 Whitney U test.

57

58 **Supplementary Figure 10. Circulating and splenic hematopoietic and myeloid progenitor**  
59 **cells after LPS administration.** (Complementary to Figure 8). (A) LSK and (B) LK cell  
60 numbers in the peripheral blood of *Edil3*<sup>-/-</sup> and *Edil3*<sup>+/+</sup> mice after 72h following the second  
61 injection of LPS (n=4-5 mice per group). (C) Numbers of LSK and (D) numbers of LK cells in  
62 the spleen of *Edil3*<sup>-/-</sup> and *Edil3*<sup>+/+</sup> mice after 72h following the second injection of LPS (n=9  
63 mice per group). Data presented as mean±SEM. Mann-Whitney U test.

64

65 **Supplementary Figure 11. Role of Del-1 in hematopoietic progenitor response to G-CSF**  
66 **administration.** (Complementary to Figure 9). (A) Total cellularity, (B) Gr1<sup>hi</sup>CD11b<sup>+</sup> and (C)  
67 Gr1<sup>int</sup>CD11b<sup>+</sup> myeloid cell numbers in the BM of *Edil3*<sup>-/-</sup> (n=14 mice) and *Edil3*<sup>+/+</sup> mice (n=10  
68 mice) 24h after a single G-CSF administration. (D) LSK, (E) LT-HSC, (F) ST-HSC, (G) MPP  
69 and (H) CMP cell numbers in the BM of *Edil3*<sup>-/-</sup> (n=6 mice) and *Edil3*<sup>+/+</sup> mice (n=5 mice) 24h  
70 after a single G-CSF administration. (I) Representative flow cytometry plots and (J) cell cycle  
71 analysis in LT-HSC derived from *Edil3*<sup>-/-</sup> (n=5 mice) and *Edil3*<sup>+/+</sup> mice (n=7) after three  
72 injections of G-CSF. Data presented as mean±SEM. Mann Whitney U test, \**P*<0.05, \*\**P*<0.01,  
73 \*\*\**P*<0.001.

74

75 **Supplementary Figure 12. Del-1 promotes myelopoiesis in response to G-CSF**  
76 **administration.** (Complementary to Figure 9). *Edil3*<sup>-/-</sup> and *Edil3*<sup>+/+</sup> mice were injected daily

77 with G-CSF (n=6 mice per group) or PBS (n=5 mice per group) for 6 days. (A) The percentage of  
78 GMPs was assessed by flow cytometry. The percentage of GMPs in the BM after 6 daily  
79 injections of G-CSF was expressed relative to the percentage of GMPs in the BM after 6 daily  
80 injections of PBS (% G-CSF/ % PBS). (B) The percentage of LSK cells was assessed by flow  
81 cytometry. The percentage of LSKs in the BM after 6 daily injections of G-CSF was expressed  
82 relative to the percentage of LSKs in the BM after 6 daily injections of PBS (%G-CSF/ %PBS).  
83 Data presented as mean±SEM. Mann Whitney U test, \*\* $P<0.01$ .

84

85 **Supplementary Figure 13.** (Complementary to Figure 9). (A) *Cxcl12* (B) *Angpt1* and (C) *Kitl*  
86 mRNA levels in the BM of *Edil3<sup>+/+</sup>* and *Edil3<sup>-/-</sup>* mice on day 6 of the G-CSF administration  
87 protocol. Mice treated with PBS were used as control (Ctrl) (n=6-7 mice per group). Data  
88 presented as mean±SEM. One-way ANOVA followed by Holm Sidak's multiple comparison test,  
89 \* $P<0.05$ , \*\* $P<0.01$ , \*\*\* $P<0.001$ , \*\*\*\* $P<0.0001$ .

# Supplementary Figure 1

Del-1/VE-cadh

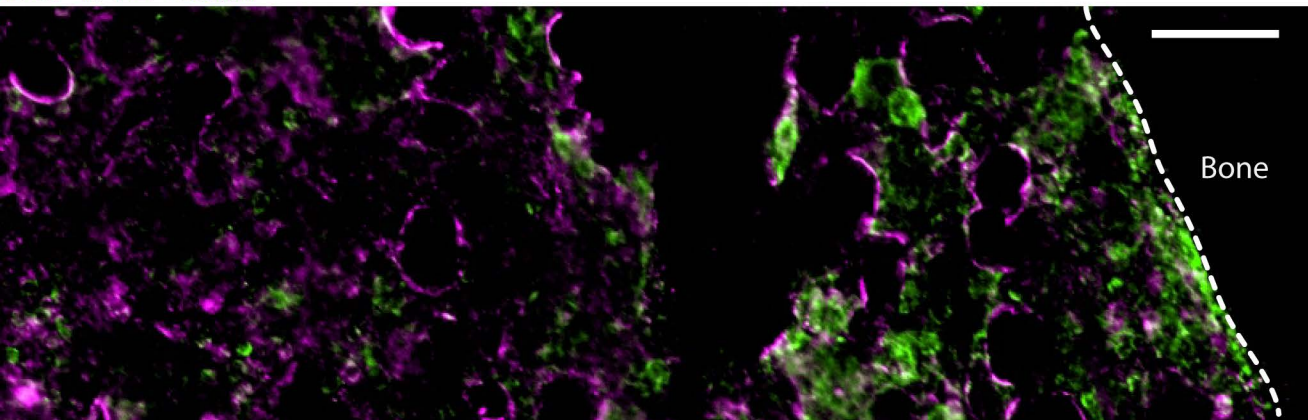

Del-1/VE-cadh/DAPI

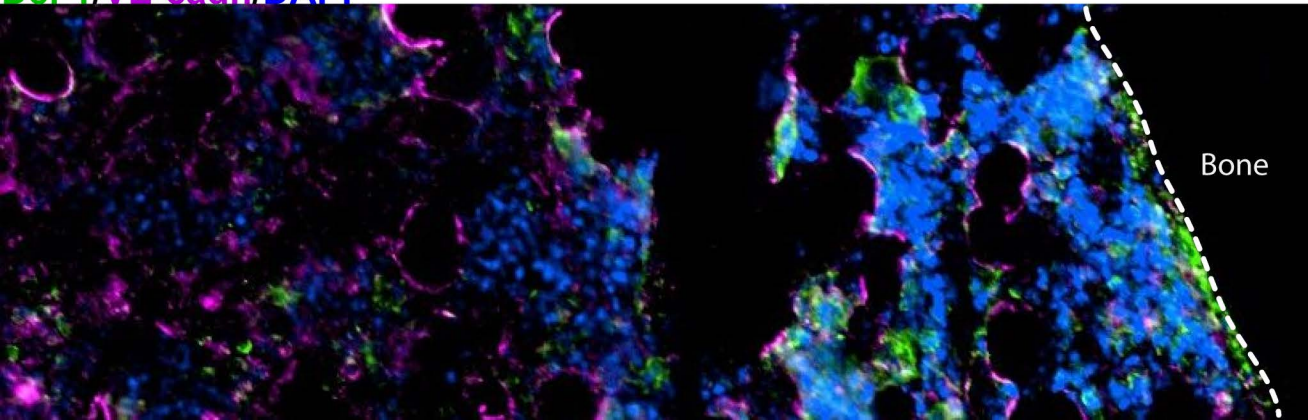

# Supplementary Figure 2

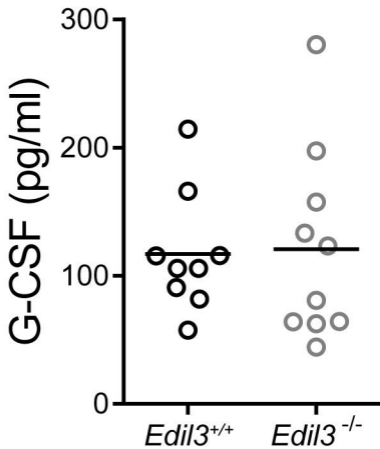



A

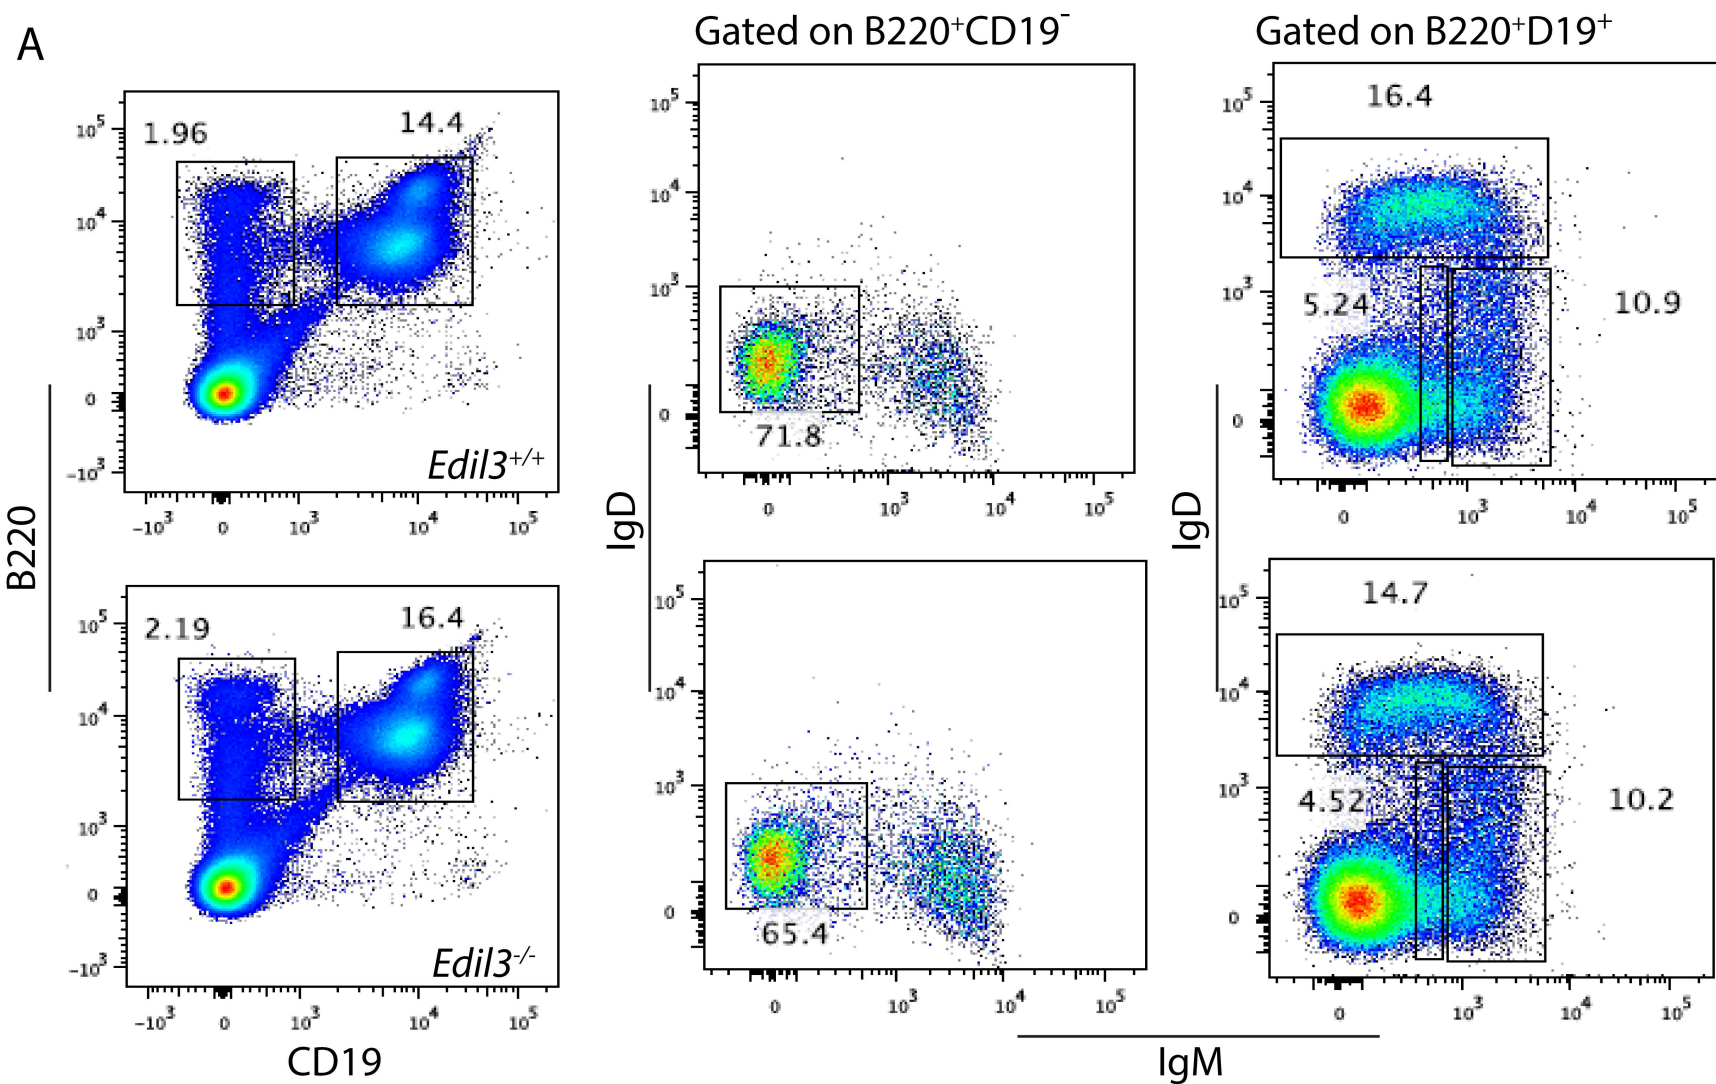

B

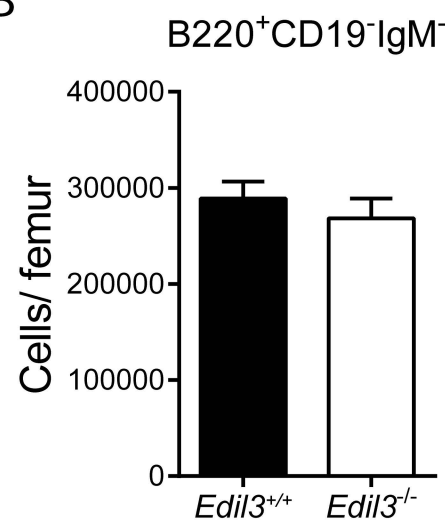

C

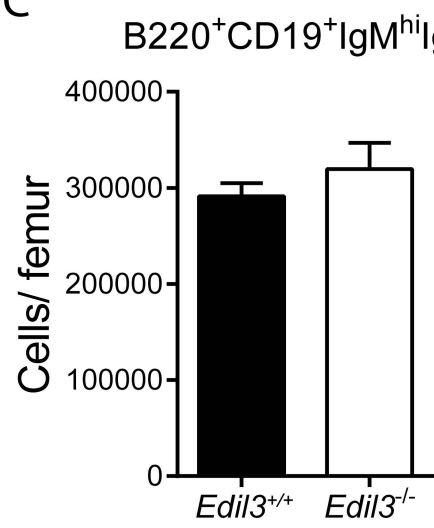

D

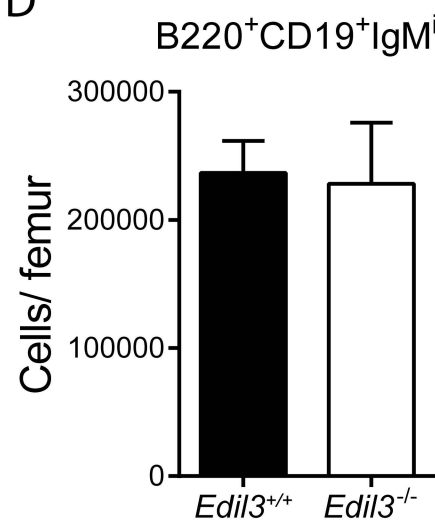

E

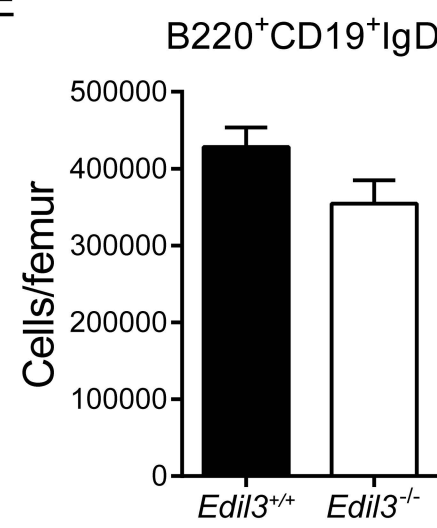

F

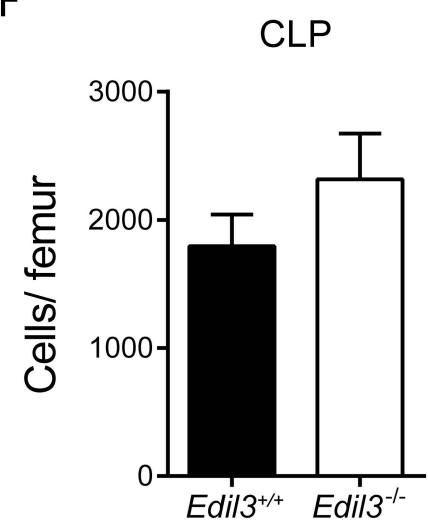

# Supplementary Figure 4

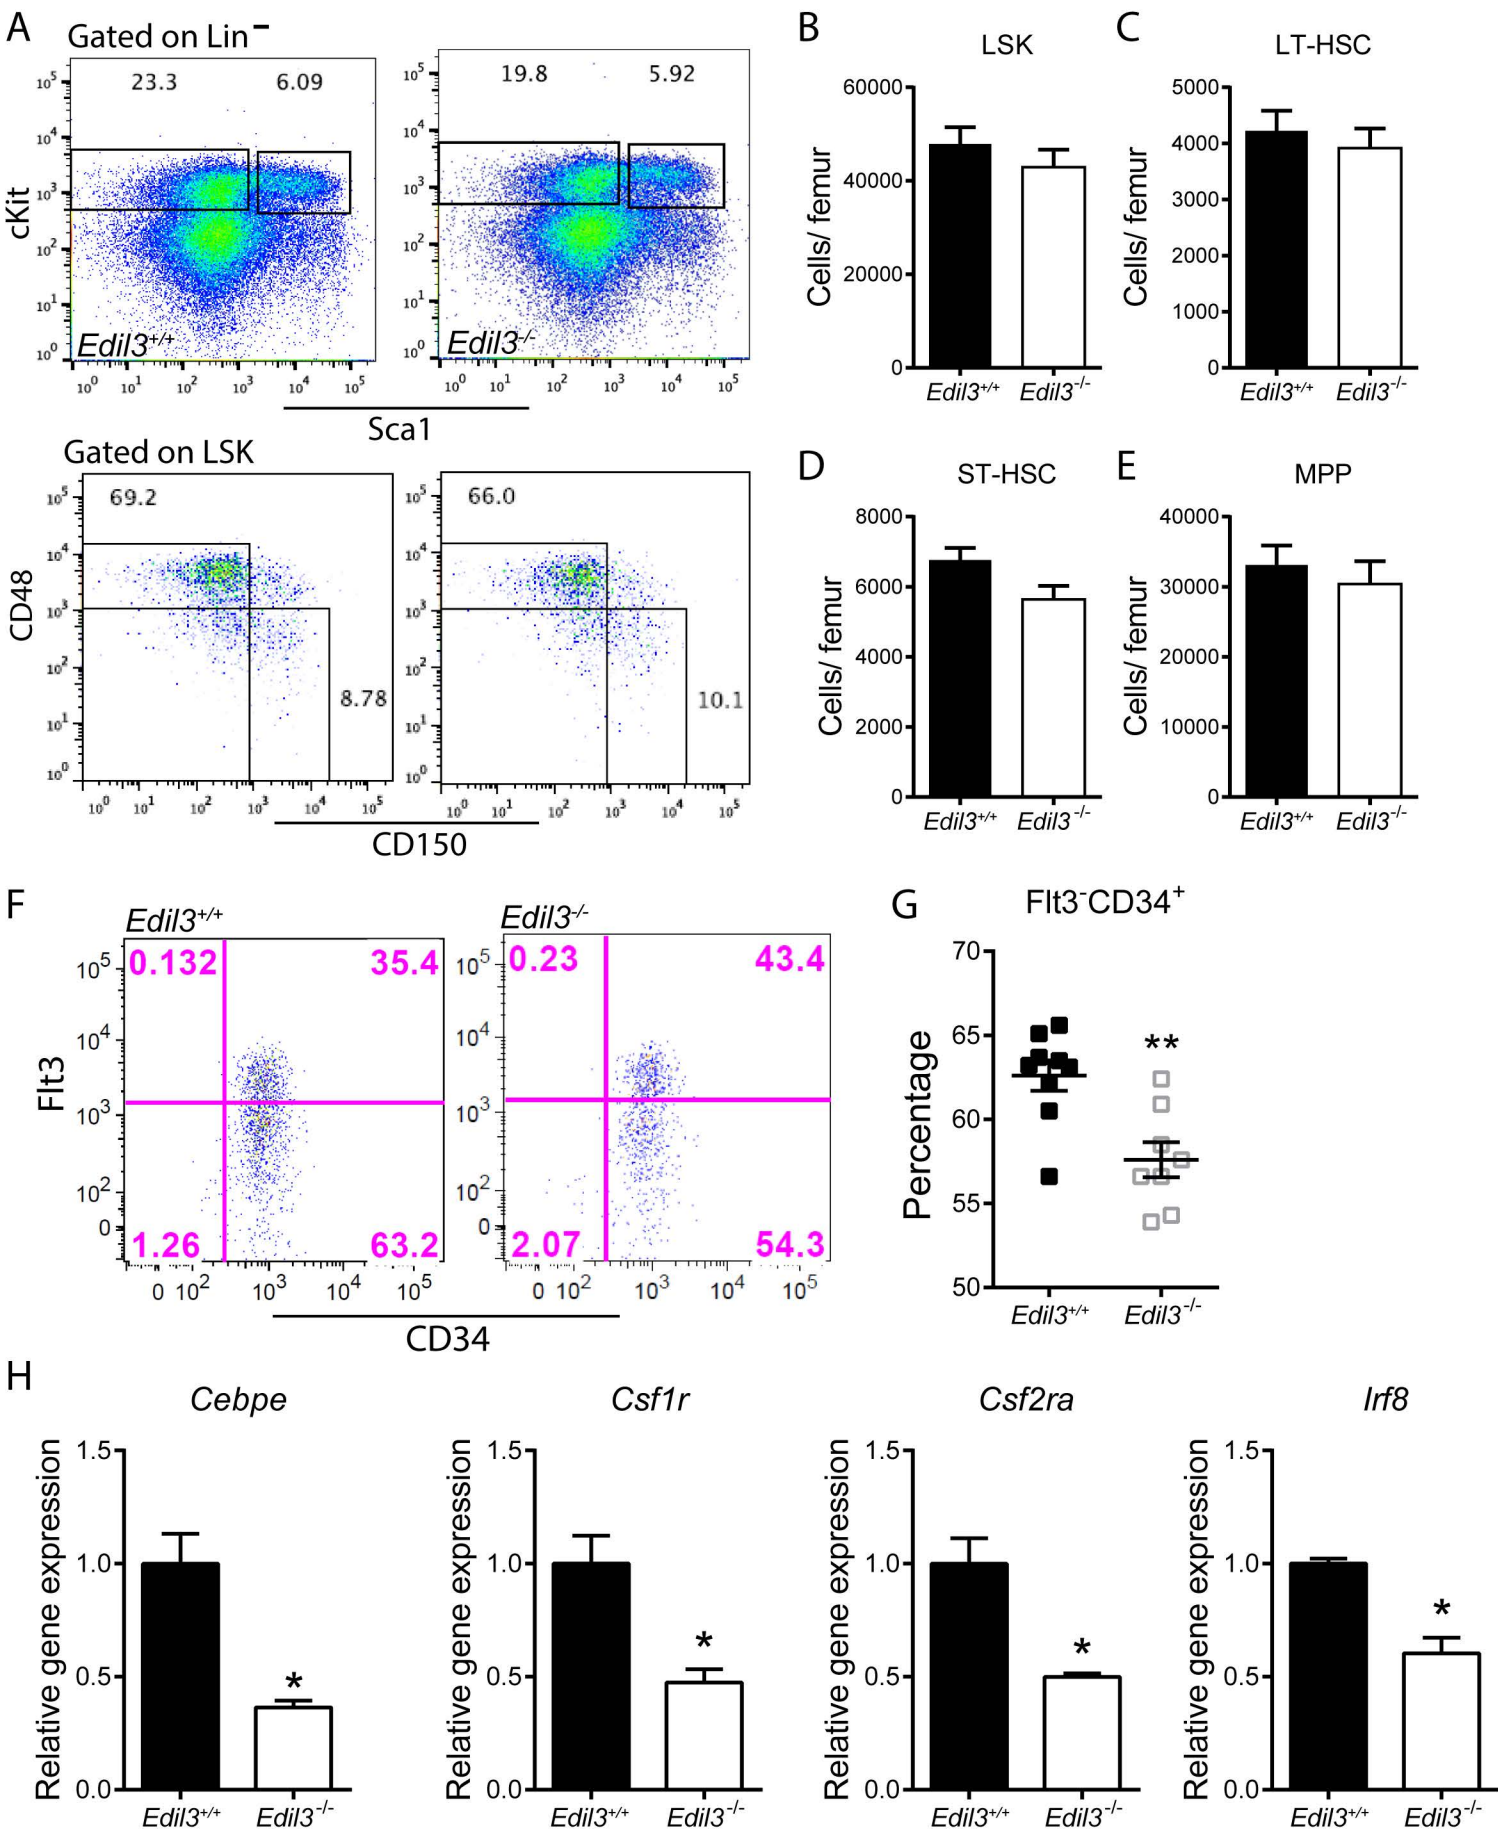

# Supplementary Figure 5

**A****LSK**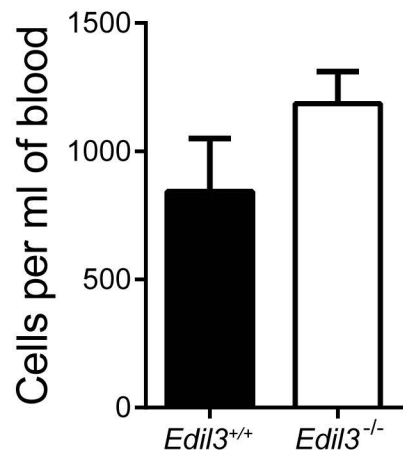**B****LK**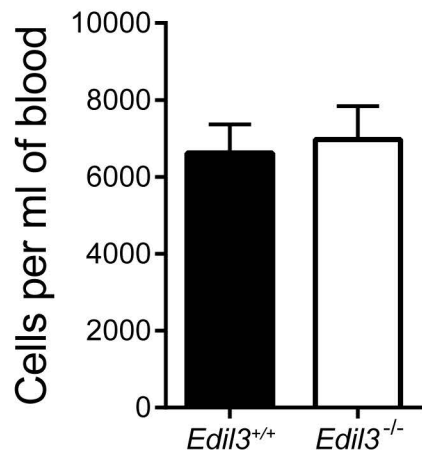**C**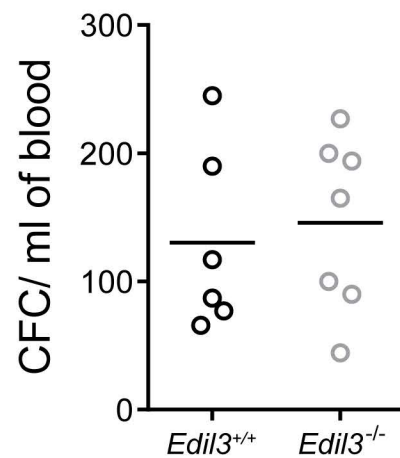**D**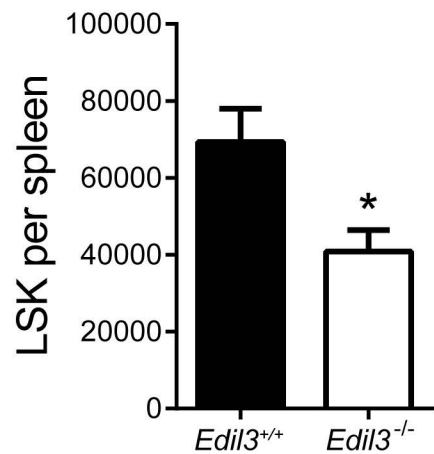**E****LSK**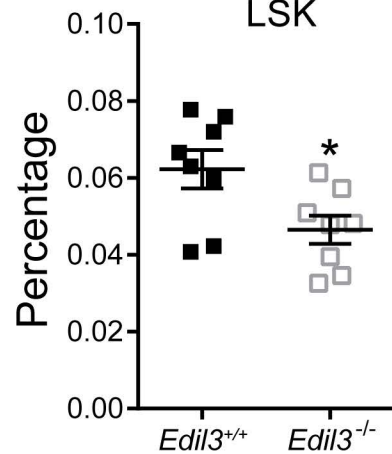**F**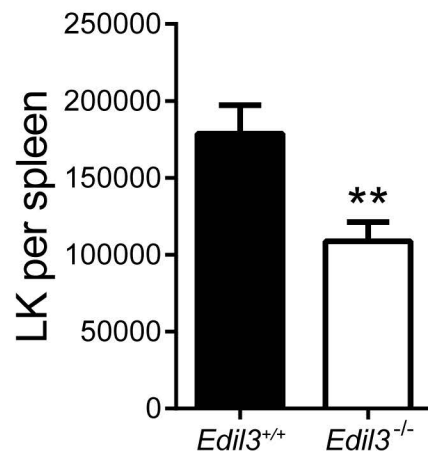**G****LK**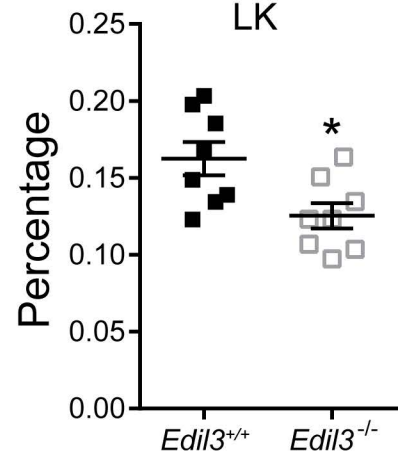

# Supplementary Figure 6

## A

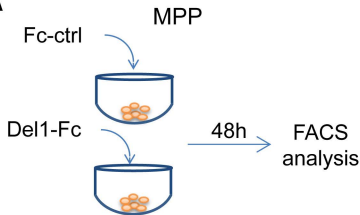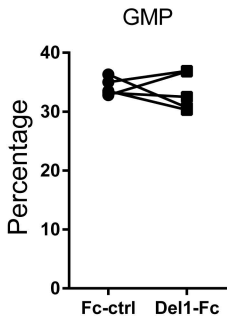

## B

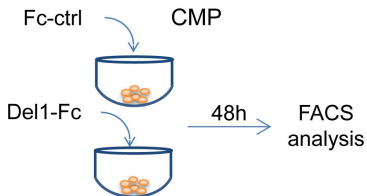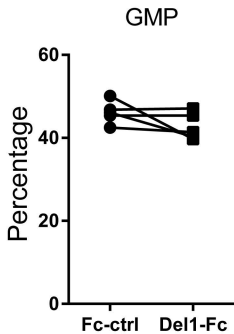

# Supplementary Figure 7

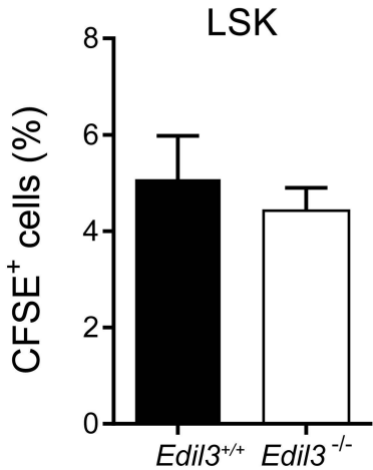

# Supplementary Figure 8

**A**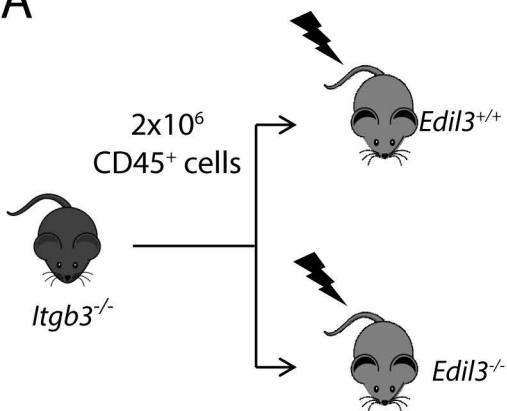**B**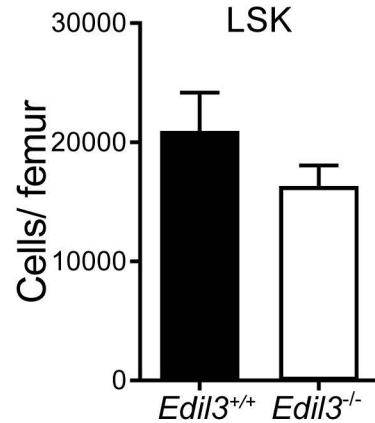**C**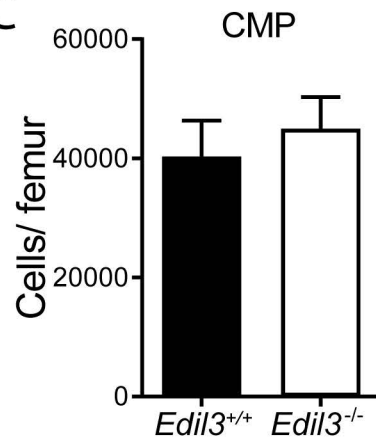**D**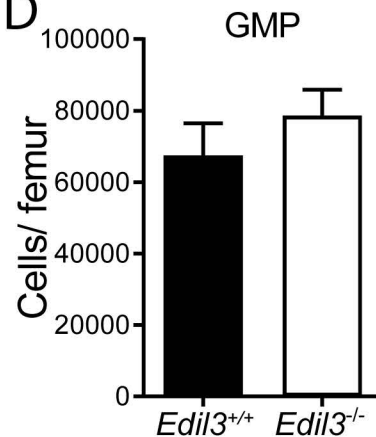**E**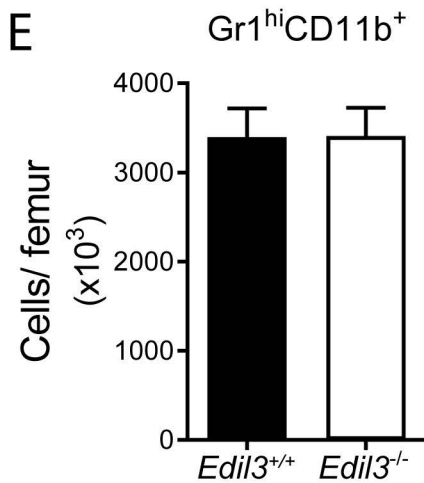**F**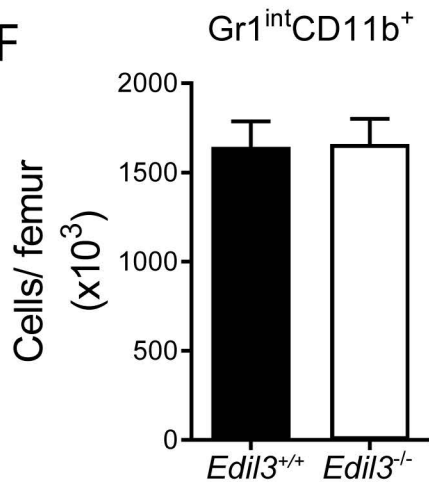

Supplementary Figure 9

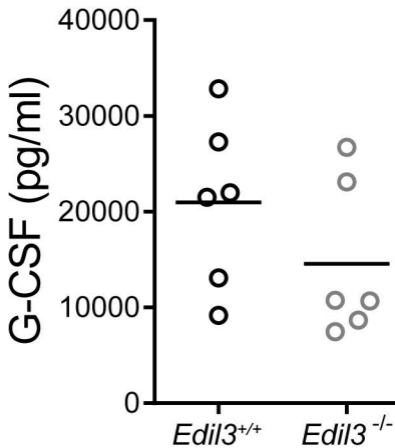

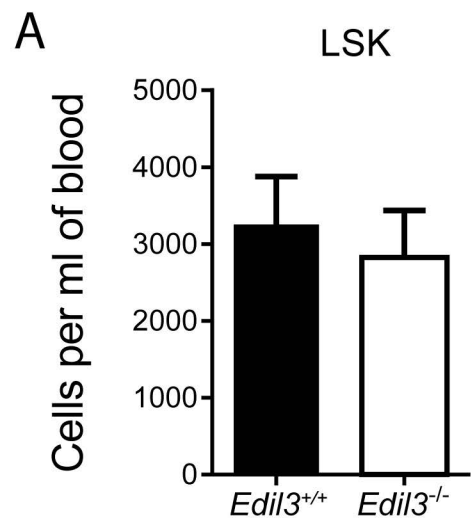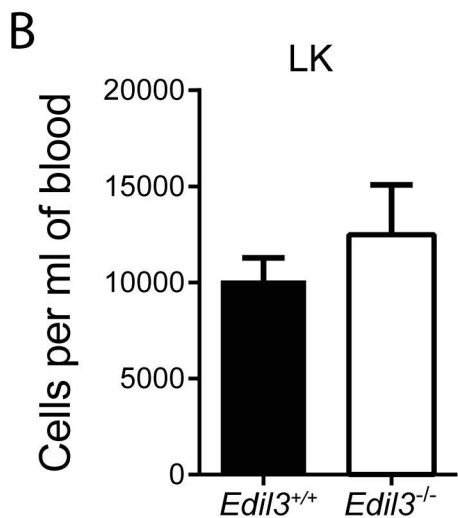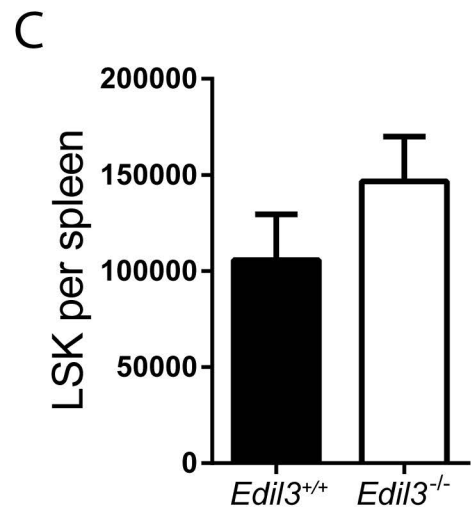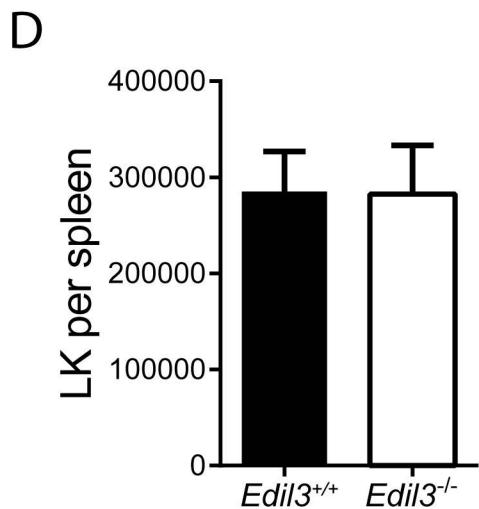



# Supplementary Figure 11

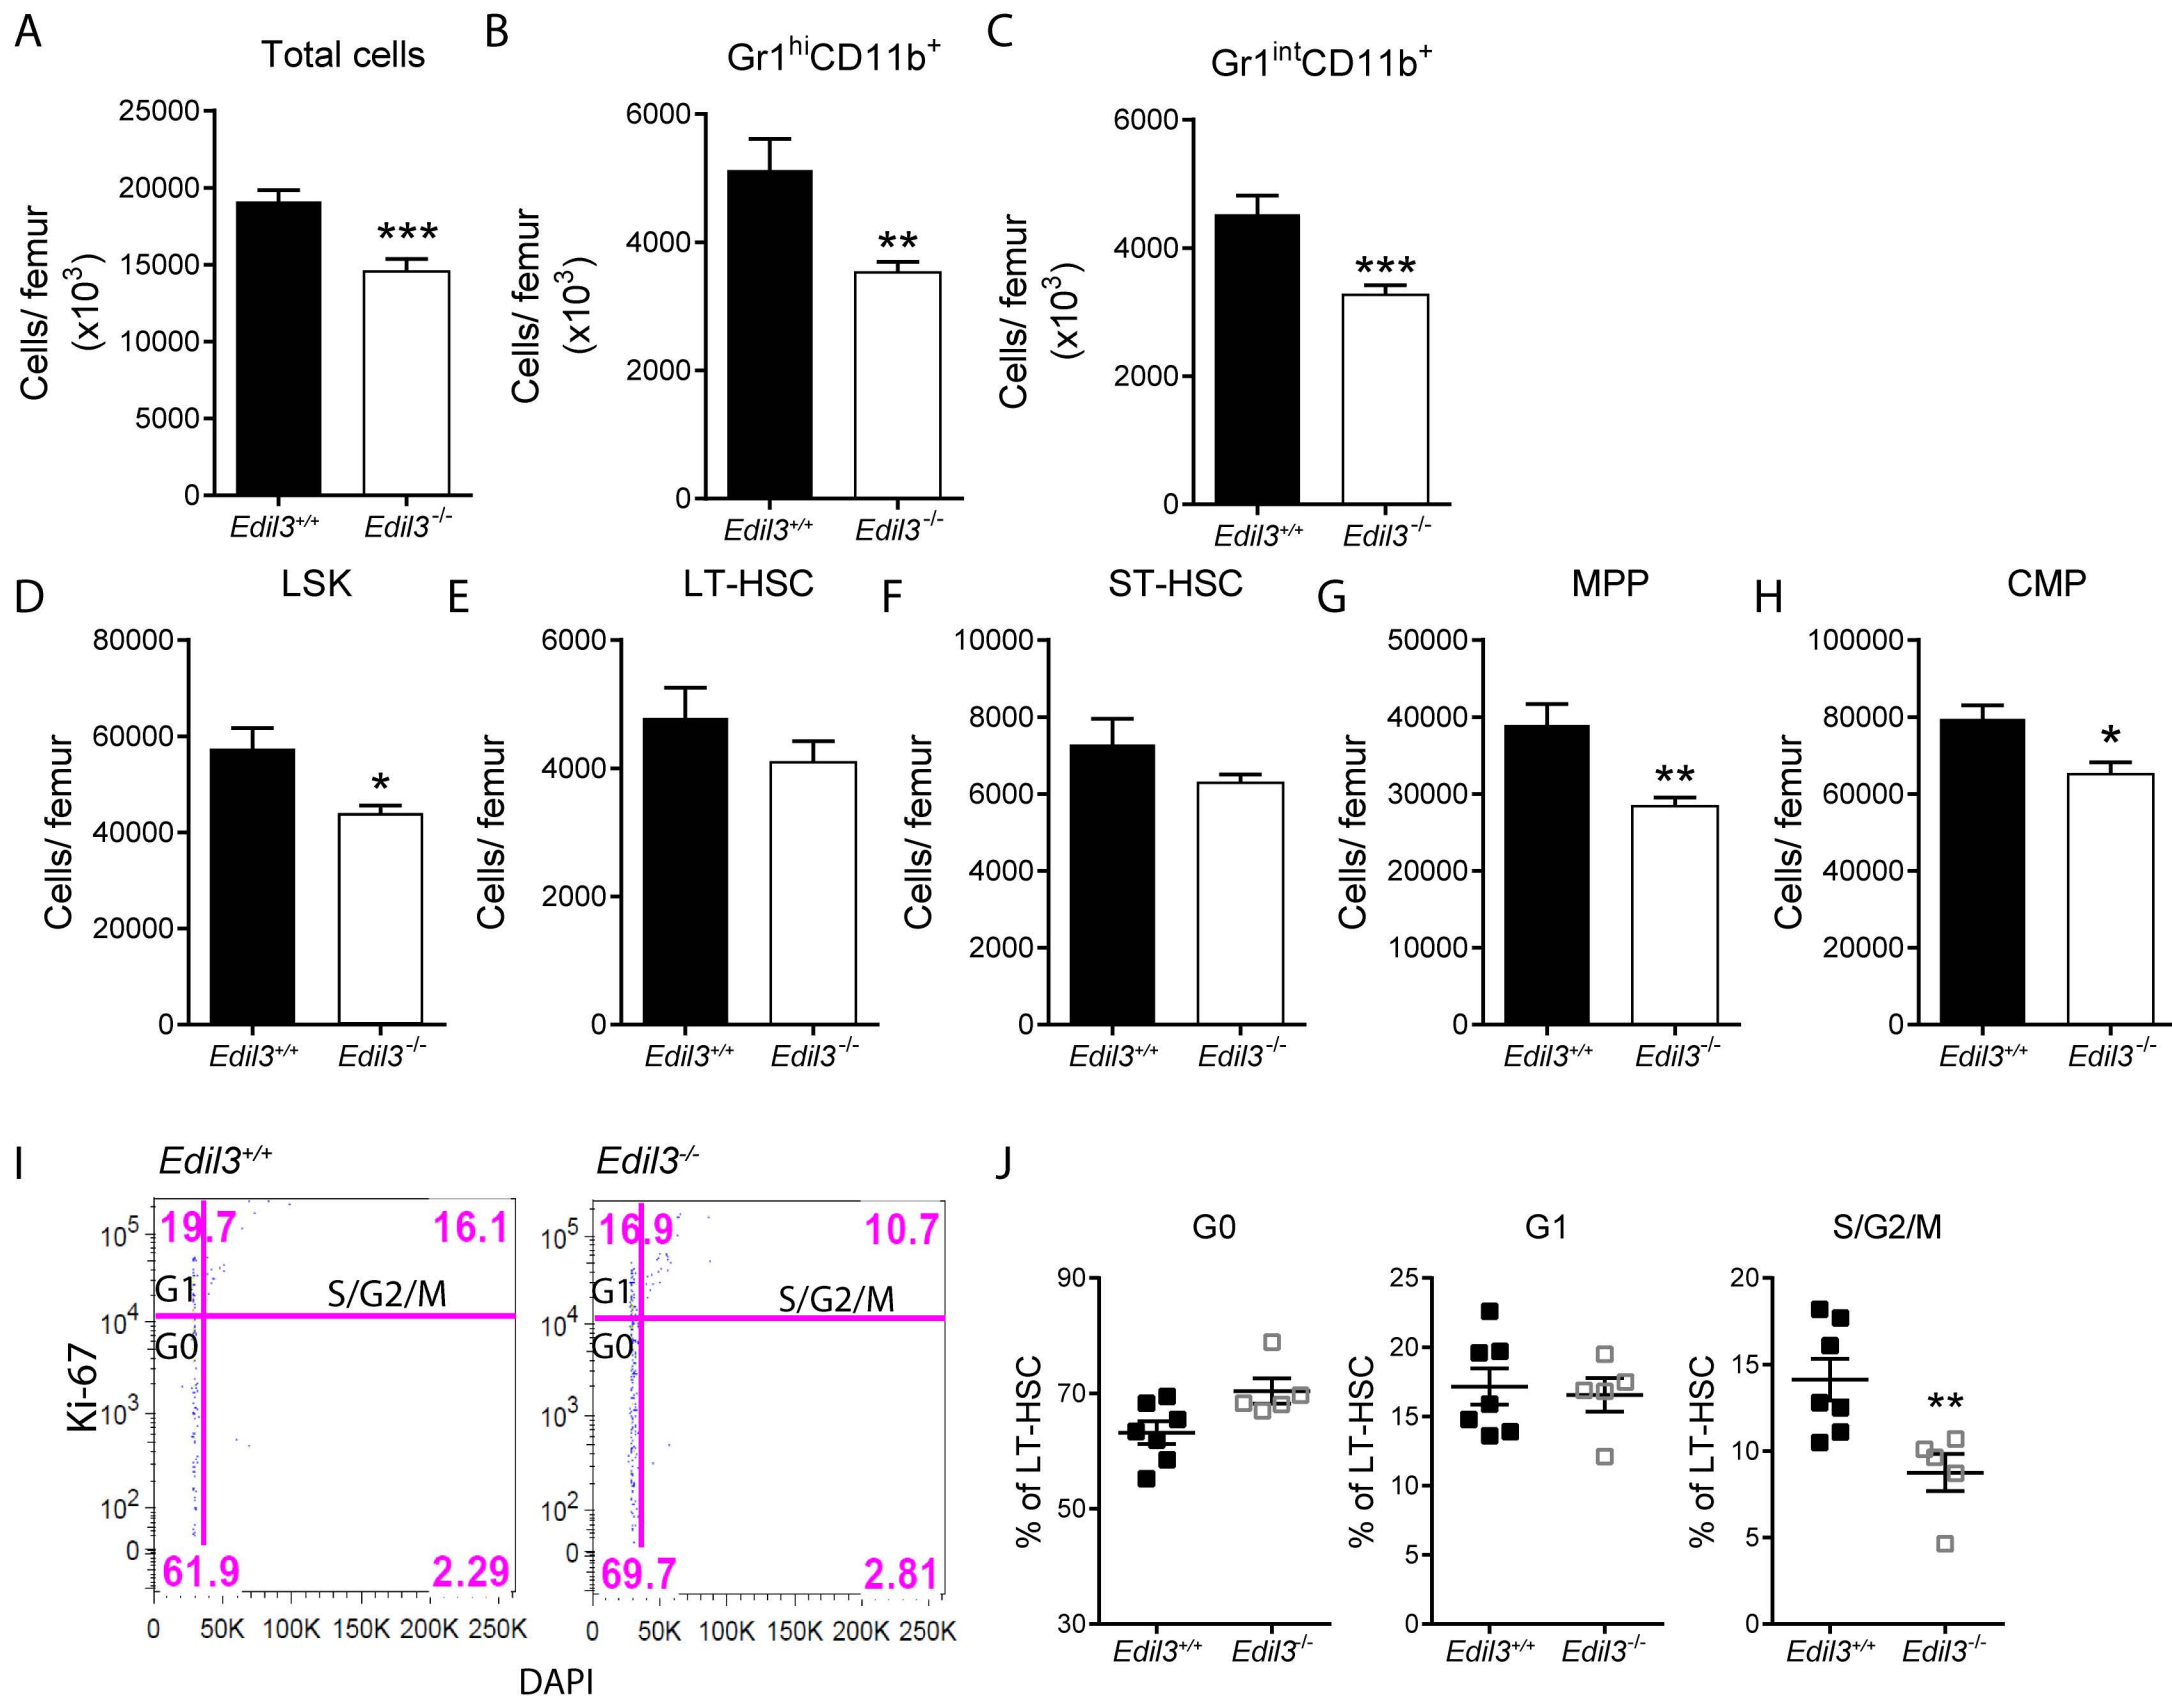

# Supplementary Figure 12

**A** **GMP** **B**

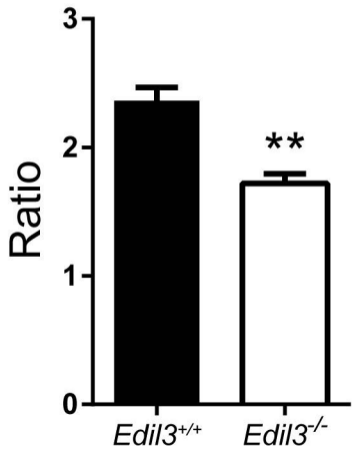

**B** **LSK**

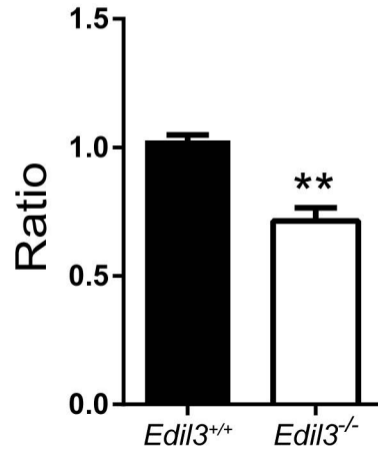

# Supplementary Figure 13

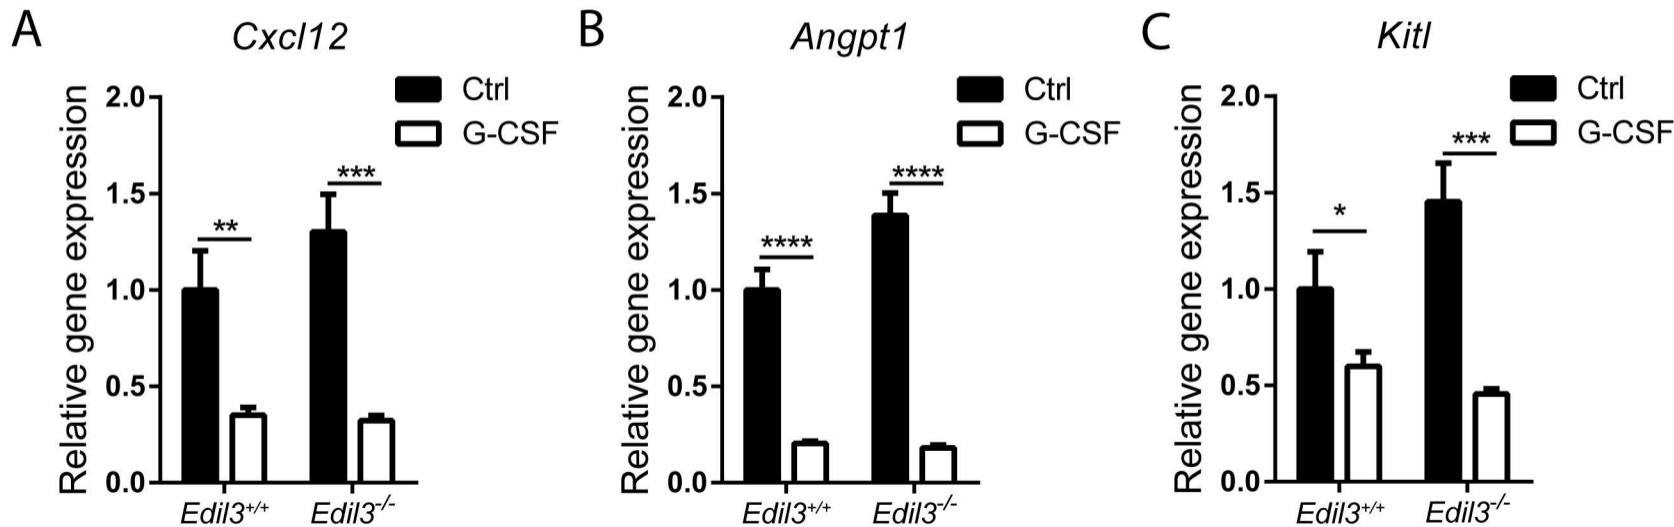

Supplement: jci-127-92571-s001.pdf [file jci-127-92571-s001.pdf]
